# Supplementary material
Source: Springer Nature journal article supplement (https://www.springermedizin.de/resource/supplementary/12967_2011_828_MOESM7_ESM.pdf/9577140)
Supplement: MOESM7 [file 9577140]

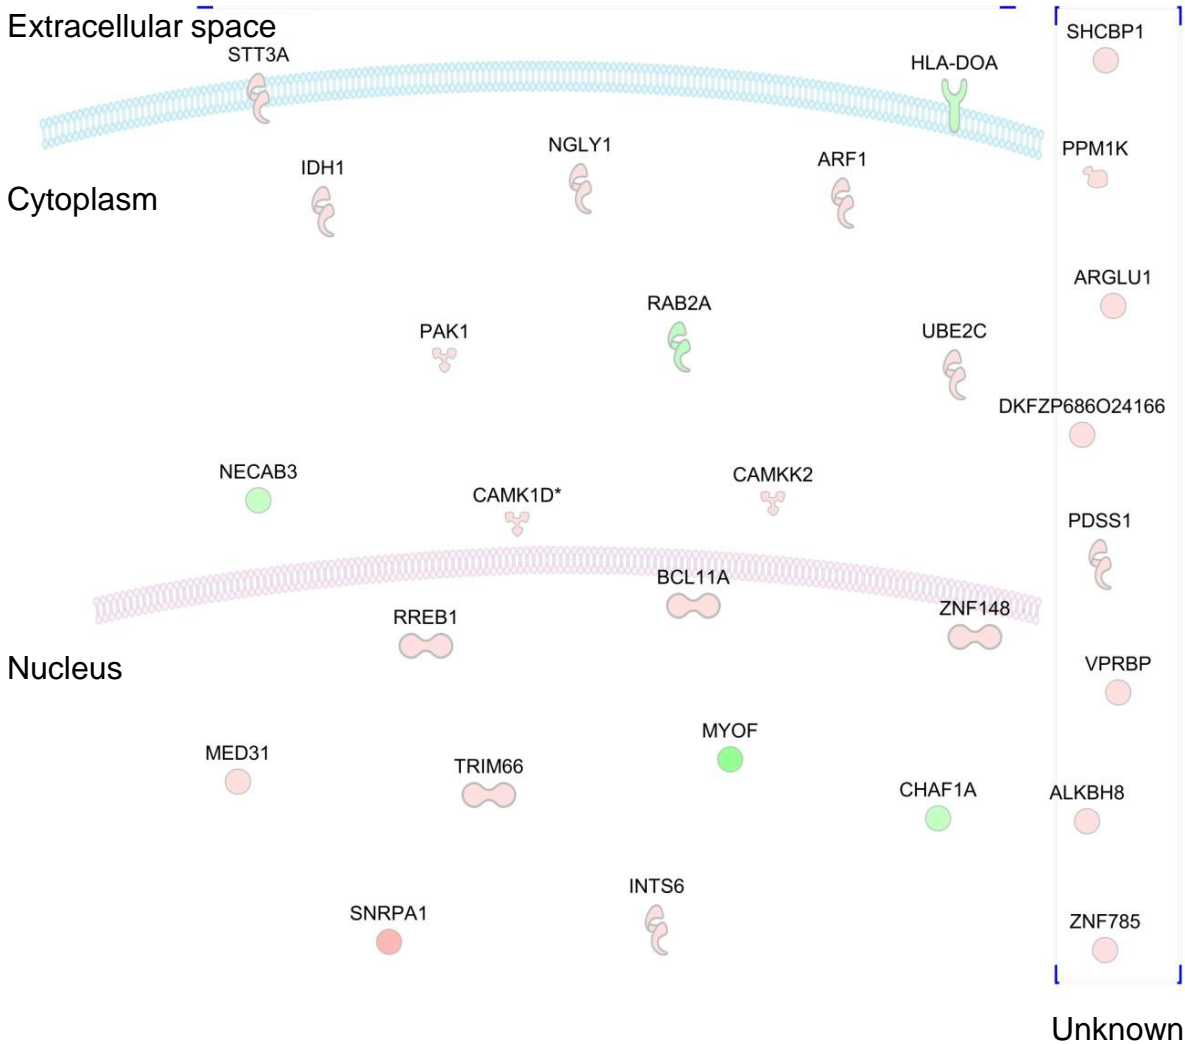

#### Path Designer Shapes

|  |                            |  |                         |  |                 |
|--|----------------------------|--|-------------------------|--|-----------------|
|  | Cytokine / Growth Factor   |  | Phosphatase             |  | Transporter     |
|  | Enzyme                     |  | Transcription Regulator |  | Complex / Group |
|  | G-protein Coupled Receptor |  | Transmembrane Receptor  |  | Other           |
|  | Kinase                     |  |                         |  |                 |
